# Supplementary material for: Effects of Boric Acid and Storage Temperature on the Analysis of Microalbumin Using Aptasensor-Based Fluorescent Detection
Source: Biosensors (Basel). 2022 Oct 24;12(11):915. doi: 10.3390/bios12110915 (PMC9687920; doi:10.3390/bios12110915)
Supplement: Supplementary file 1 [file biosensors-12-00915-s001.zip › biosensors-1945440-supplementary.pdf]

Supporting information

# Effects of boric acid and storage temperature on the analysis of microalbumin using aptasensor based fluorescent detection

**Chalermwoot Sompark<sup>1,2</sup>, Wireeya Chawjiraphan<sup>1</sup>, Manatsaphon Sukmak<sup>3,5</sup>, Ubon Cha'on<sup>3,5</sup>, Sirirat Anutrakulchai<sup>4,5</sup>, Prapasiri Pongprayoon<sup>6,7</sup>, Thitirat Putnin<sup>1</sup>, Dechnarong Pimalai<sup>1</sup>, Visarute Pinrod<sup>1</sup>, Deanpen Japrun<sup>1\*</sup>**

<sup>1</sup> National Nanotechnology Center (NANOTEC), National Science and Technology Development Agency (NSTDA), Thailand Science Park, Pathumthani, Thailand

<sup>2</sup> Postharvest and Processing Research and Development Division, Department of Agriculture, Bangkok, Thailand

<sup>3</sup> Department of Biochemistry, Faculty of Medicine, Khon Kaen University, Khon Kaen, Thailand

<sup>4</sup> Department of Internal Medicine, Faculty of Medicine, Khon Kaen University, Khon Kaen, Thailand

<sup>5</sup> Chronic Kidney Disease Prevention in the Northeast of Thailand (CKDNET), Khon Kaen University, Khon Kaen, Thailand

<sup>6</sup> Faculty of Science, Department of Chemistry, Kasetsart University, Chatuchak, Bangkok, Thailand

<sup>7</sup> Center for Advance Studies in Nanotechnology for Chemical, Food and Agricultural Industries, KU Institute for Advance Studies, Kasetsart University, Bangkok, Thailand

\* Correspondence: deanpen@nanotec.or.th; Tel.: +66 117 6665

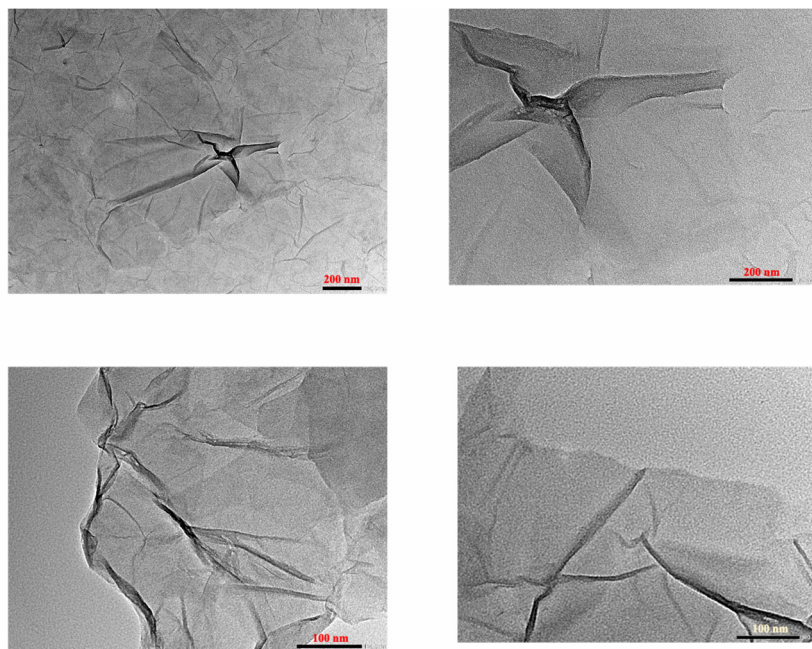

**Figure S1.** Transmission electron microscopy (JEM-2100Plus, JEOL, USA) image of synthesized GO used in this study.

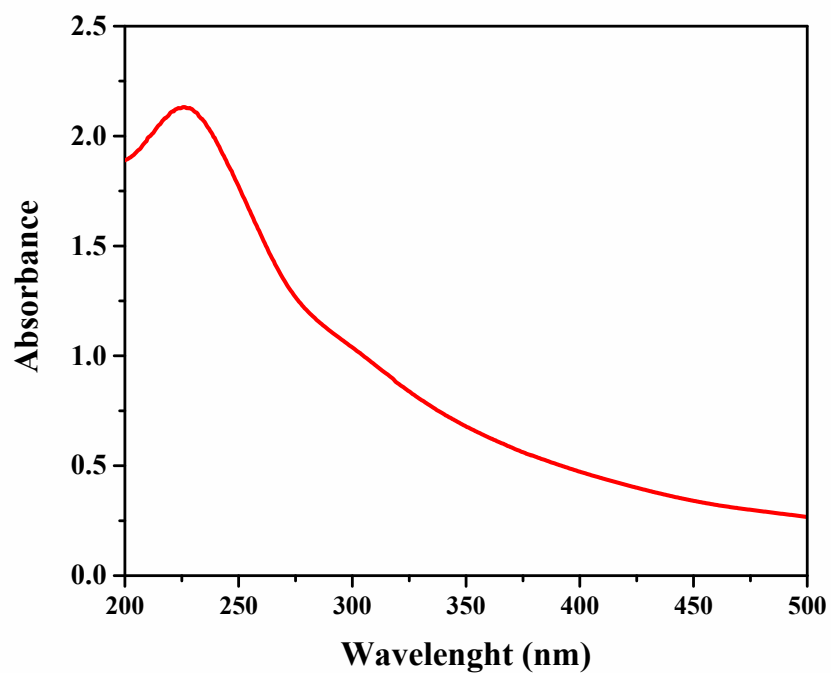

**Figure S2.** UV spectra of graphene oxide was recorded in the wavelength of 200-500 nm using PowerWave XS2. The spectrum of graphene oxide has an absorption peak at 230 nm which is attributed to p-p\* transition of remaining  $sp^2$  C=C bonds.

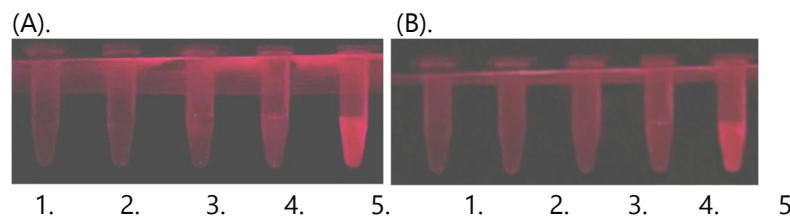

**Figure S3.** Fluorescence images of the vial containing aptasensor solution with HSA concentration of 0 µg/mL (tube 1), 2 µg/mL (tube 2), 80 µg/mL (tube 3), 150 µg/mL (tube 4) and aptamer labeled with Cy5 fluorescence dye (positive control, tube 5) in PBS with boric acid (A) and without boric acid (B).

**Table S1.** LOD and LOQ calculation

| Items           | Condition with PBS                | Condition with PBS and Boric       |
|-----------------|-----------------------------------|------------------------------------|
| Equation        | $y = 0.197x - 0.4287, R^2=0.9928$ | $y = 0.2898x + 0.3267, R^2=0.9918$ |
| Slope           | 0.197                             | 0.2898                             |
| SE of intercept | 0.441234                          | 0.68914                            |
| LOD (µg/mL)     | 6.72                              | 7.134                              |
| LOQ (µg/mL)     | 22.40                             | 23.78                              |

**Table S2.** Performance of existing methods use in hospital and the developed aptasensor (this study).

| Comparing items  | Immunoturbidimetry<br>(Hospital use) | Lateral flow immunoassay<br>(Hospital use) | Aptasensor<br>(This study) |
|------------------|--------------------------------------|--------------------------------------------|----------------------------|
| LOD or cut off   | 6 µg/mL (LOD)                        | 30-50 µg/mL (cut off)                      | 6.72 µg/mL                 |
| Assay type       | Quantitative                         | Qualitative                                | Quantitative               |
| Targeting ligand | Antibody                             | Antibody                                   | Aptamer                    |
| Assay time (min) | 5-10                                 | 5-10                                       | 30                         |
| POCT             | No                                   | Yes                                        | Yes                        |
| Cost (USD)       | 2                                    | 5-10                                       | 0.3                        |
